# Supplementary material
Source: PubMed Central journal article supplement (PMC5876623)
Supplement: am8b01294_si_001.pdf [file am8b01294_si_001.pdf]

## Supporting Information

### A Highly Elastic Biodegradable Single-Network Hydrogel for Cell Printing

*Cancan Xu<sup>†,‡</sup>, Wenhan Lee<sup>§</sup>, Guohao Dai<sup>§\*</sup>, and Yi Hong<sup>†,‡\*</sup>*

<sup>†</sup>Department of Bioengineering, University of Texas at Arlington, Arlington, TX 76019, USA

<sup>‡</sup>Joint Biomedical Engineering Program, University of Texas Southwestern Medical Center,  
Dallas, TX 75390, USA

<sup>§</sup>Department of Bioengineering, Northeastern University, Boston, MA 02115, USA

#### **\*Corresponding authors:**

Yi Hong, [yihong@uta.edu](mailto:yihong@uta.edu), Tel: +1-817-272-0562; Fax: +1-817-272-2251;

Guohao Dai, [g.dai@northeastern.edu](mailto:g.dai@northeastern.edu), Tel: +1- 617-373-2207.

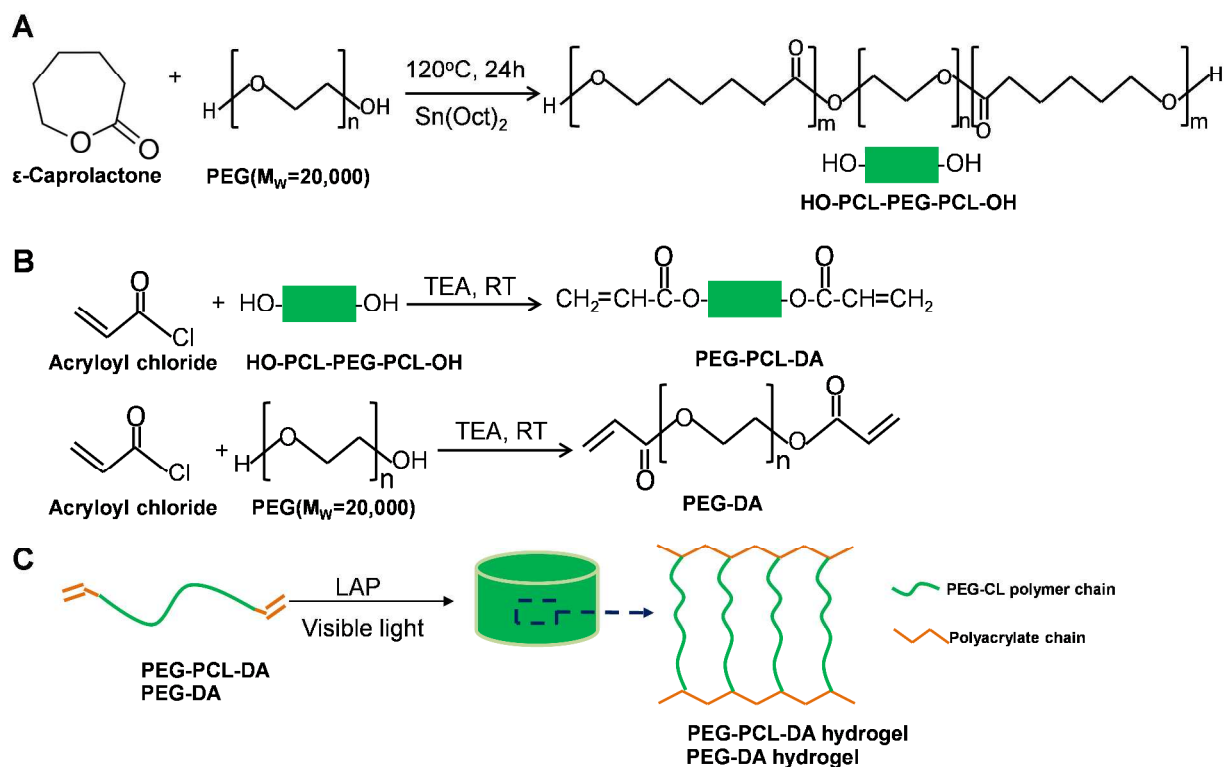

**Figure S1.** Synthetic schemes of (A) PCL-PEG-PCL copolymer diols via ring-opening polymerization, and (B) acrylated PEG-PCL-DA and PEG-DA polymers. (C) PEG-PCL-DA and PEG-DA hydrogel formation via visible-light initiated photopolymerization. TEA: triethylamine; RT: room temperature; LAP: photo-initiator lithium phenyl(2,4,6-trimethylbenzoyl) phosphinate.

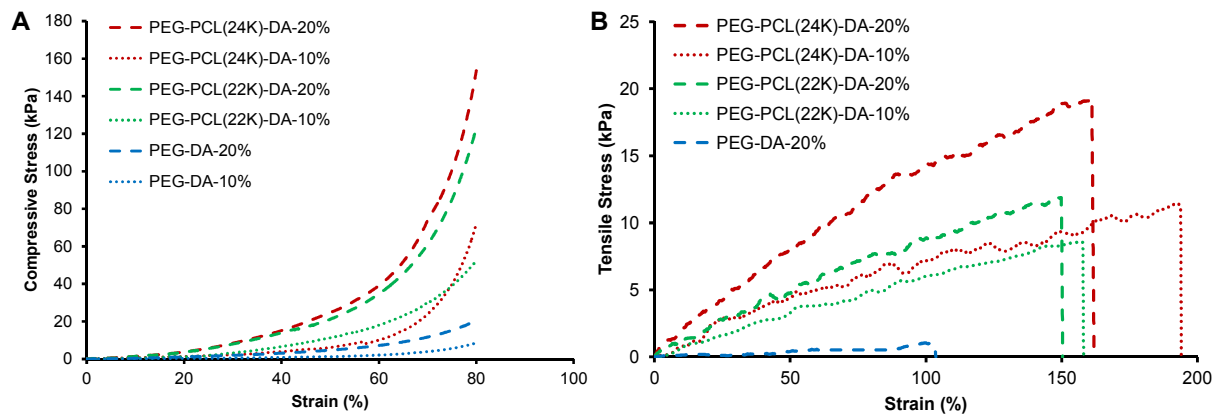

**Figure S2.** Comparison of (A) compression and (B) tensile properties of PEG-PCL-DA hydrogels at 10% and 20% concentrations after 24 h PBS immersion (wet state).

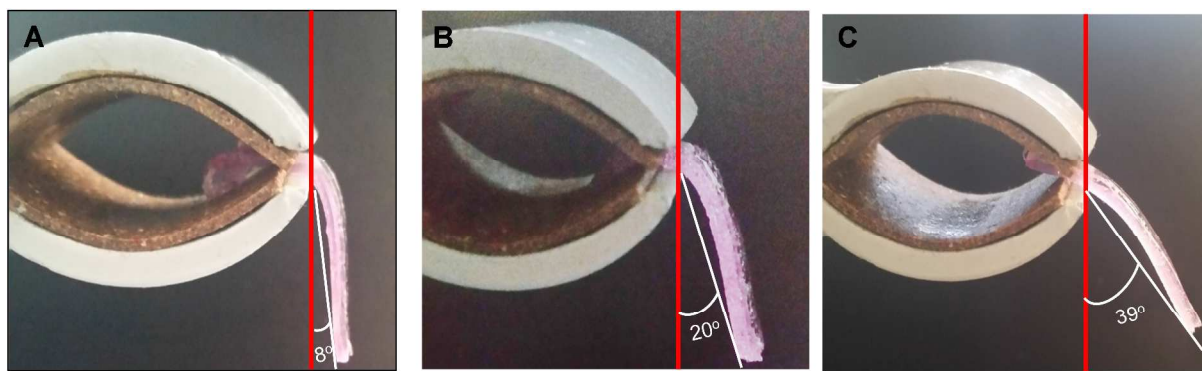

**Figure S3.** Qualitatively depiction of hydrogels suspended on a cantilever right after gelation. (A) PEG-DA, (B) PEG-PCL(22K)-DA, and (C) PEG-PCL(24K)-DA.

**Video S1.** PEG-PCL(24K)-DA-40% stretching and twisting.

**Video S2.** PEG-DA-40% stretching and twisting.
